# Supplementary material for: Geometric features of middle cerebral artery are associated with spontaneous basal ganglia intracerebral haemorrhage
Source: HighWire-hosted journal article supplement (doi:10.1136/svn-2021-001277), 2022-03-09

# model

- Marc model (Silicon rubber vessel)
  - Analysis type Transient dynamics
  - Young's modulus 0.3 Mpa
  - Poisson's ratio 0.49
- scFLOW model (Water)
  - Analysis type Transient flow
  - Material model Incompressible water
- Co-Simulation condition
  - Time step 0.01 sec
  - Time period 3 sec
  - Stenosis area rate 75% model and 90% model

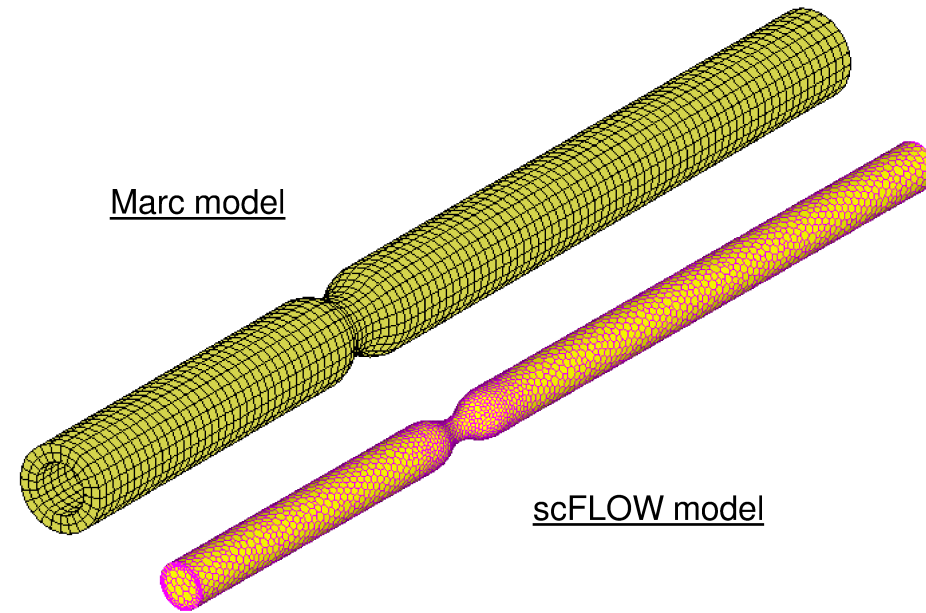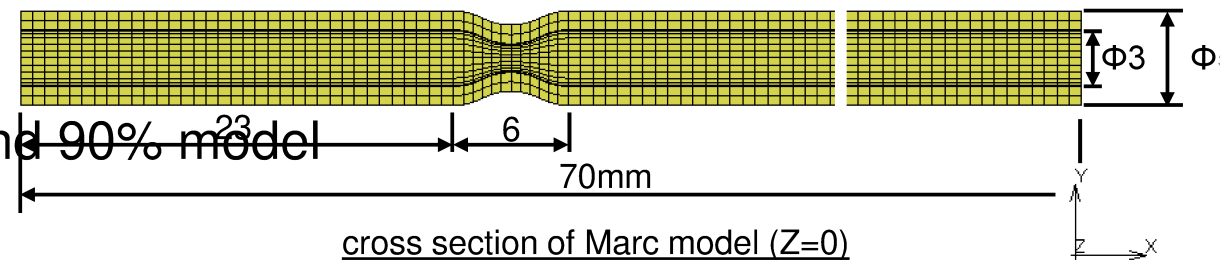

result

Stenosis rate 75%

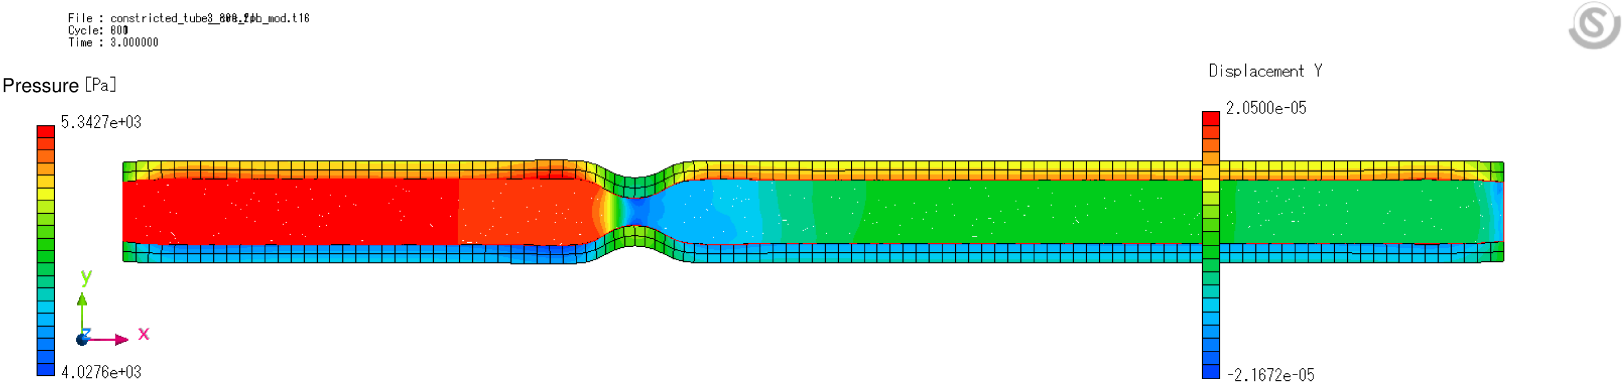

Stenosis rate 90%

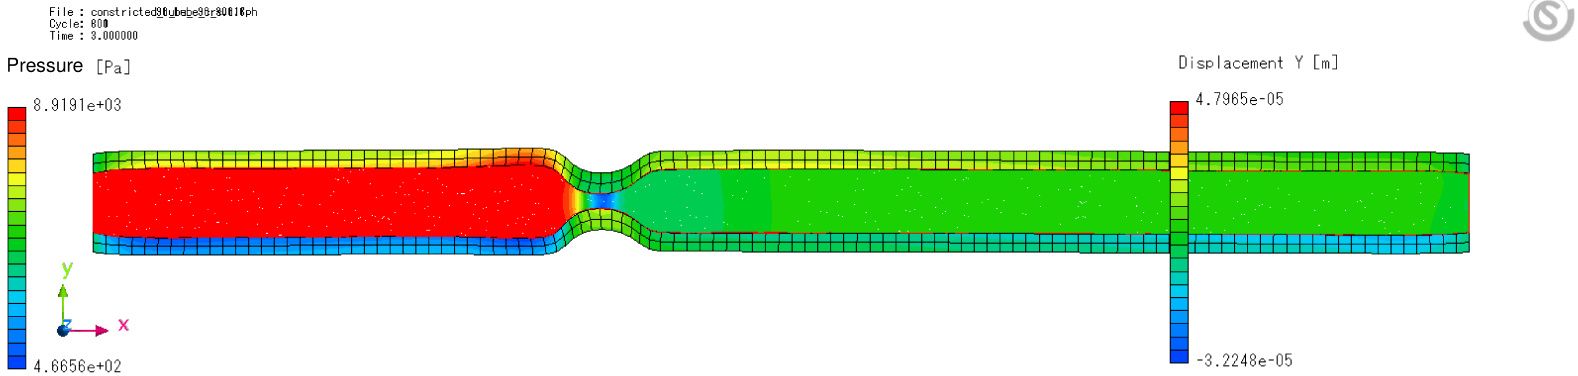

result

Stenosis rate 75%

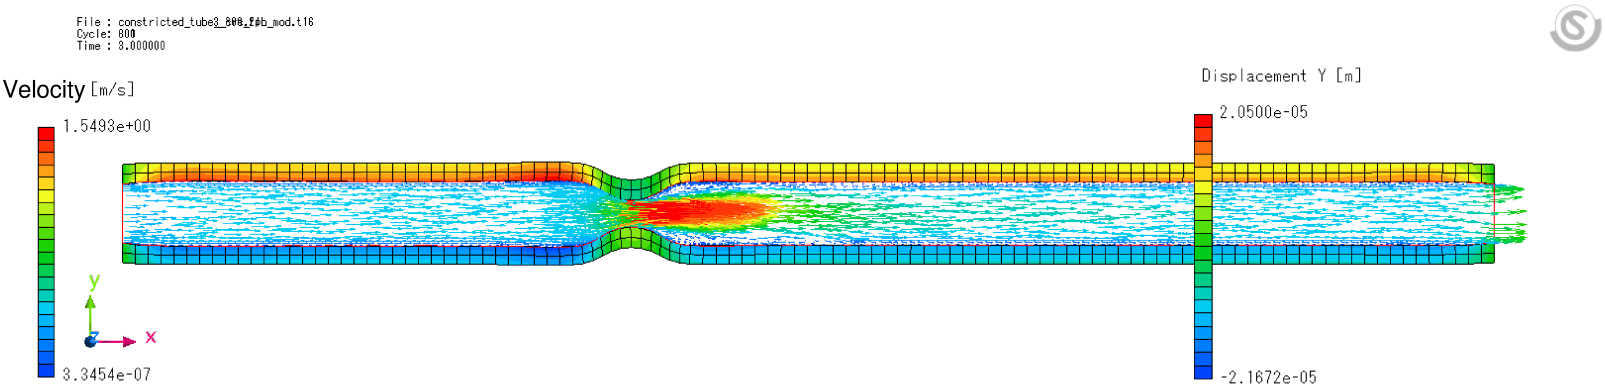

Stenosis rate 90%

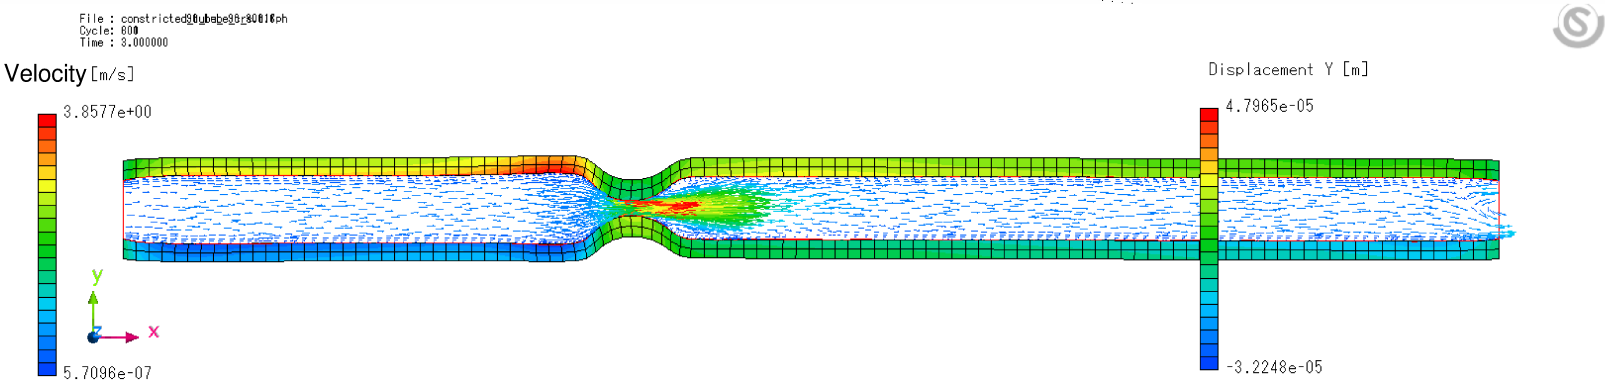

# result

- Pressure history
  - Experimental result and co-simulation result comparison, 75% stenosis rate
    - Good agreement in peak pressure at inlet
    - Experimental result includes pump noise pressure turbulence

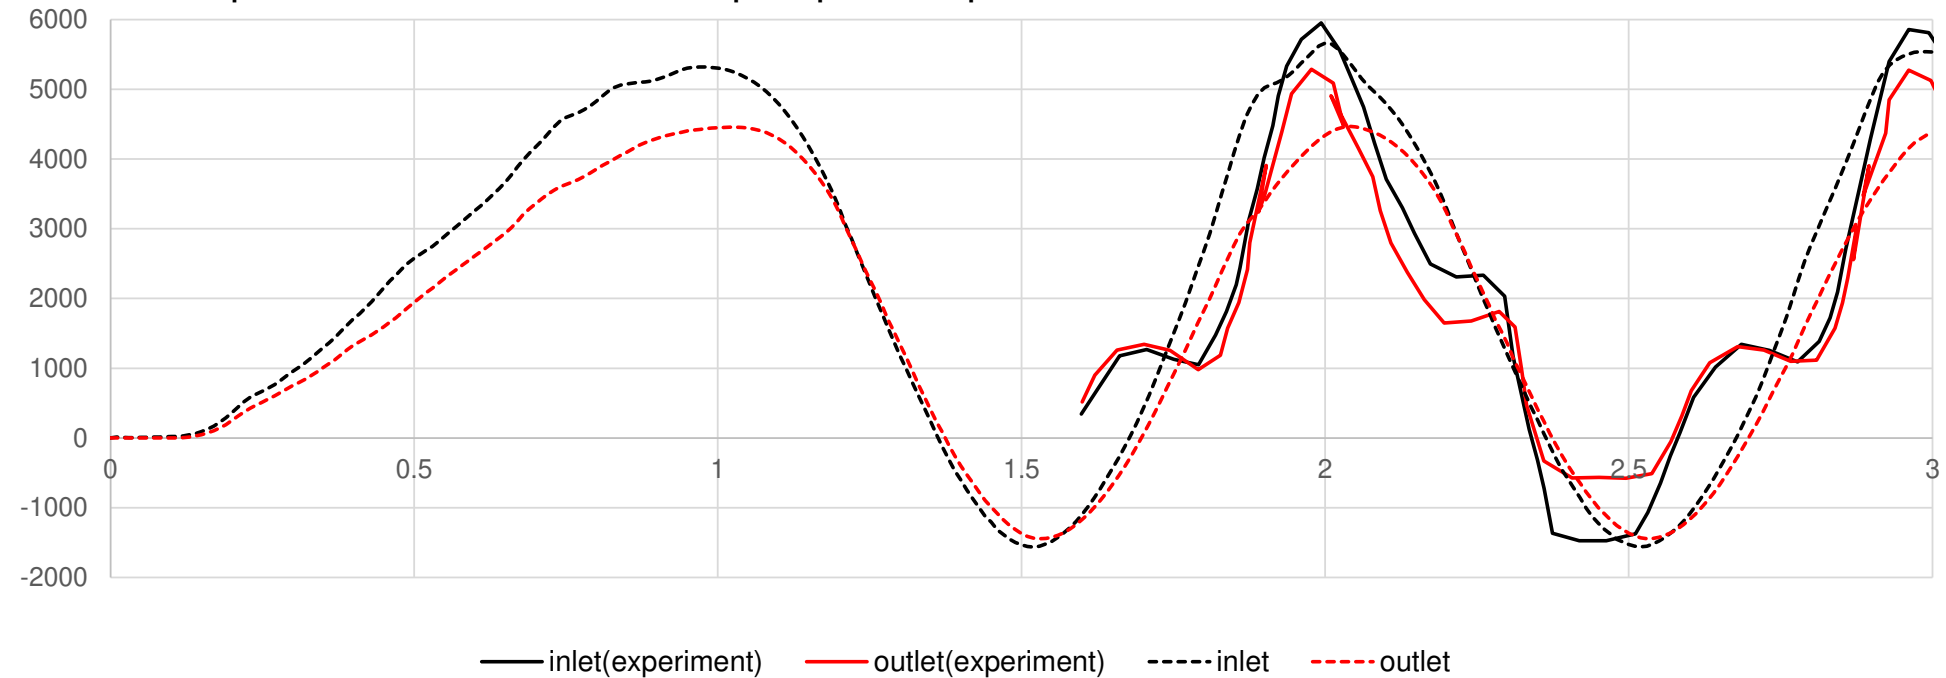

Supplement: svn-2021-001277supp003_data_supplement.pdf [file svn-2021-001277supp003_data_supplement.pdf]
